# Supplementary material
Source: Springer Nature journal article supplement (https://www.springermedizin.de/resource/supplementary/12916_2013_981_MOESM15_ESM.pdf/9598756)
Supplement: MOESM15 [file 9598756]

**Supplementary Table 14:** Genes displaying significant difference in mRNA expression between control and palmitate treated human pancreatic islets ( $q < 0.05$ ) as well as significant correlation between BMI and mRNA expression in human pancreatic islets ( $P < 0.05$ ).

| Gene symbol    | Probe set ID | mRNA expression |                       |                         |                                    |         |         | BMI correlated with mRNA expression |         |
|----------------|--------------|-----------------|-----------------------|-------------------------|------------------------------------|---------|---------|-------------------------------------|---------|
|                |              | Chr             | Control mean $\pm$ sd | Palmitate mean $\pm$ sd | Diff. in expr. (palmitate-control) | P-value | q-value | Regression coefficient              | P-value |
| <i>ADM</i>     | 7938390      | 11              | 306.1 $\pm$ 136.2     | 592.8 $\pm$ 468.5       | 286.7                              | 0.0012  | 0.027   | 0.030                               | 0.033   |
| <i>AIFM2</i>   | 7934101      | 10              | 117.8 $\pm$ 19.1      | 134.9 $\pm$ 21.9        | 17.2                               | 0.0024  | 0.041   | 0.014                               | 0.038   |
| <i>ANGPTL4</i> | 8025402      | 19              | 176.2 $\pm$ 109.0     | 270.4 $\pm$ 181.2       | 94.2                               | 0.0012  | 0.027   | 0.032                               | 0.032   |
| <i>AP1M2</i>   | 8034084      | 19              | 386.9 $\pm$ 61.7      | 357.2 $\pm$ 53.2        | -29.7                              | 0.0012  | 0.027   | -0.016                              | 0.016   |
| <i>ASPM</i>    | 7923086      | 1               | 19.9 $\pm$ 5.0        | 14.4 $\pm$ 2.7          | -5.5                               | 0.0007  | 0.020   | -0.021                              | 0.040   |
| <i>BET1L</i>   | 7945349      | 11              | 156.7 $\pm$ 15.4      | 182.5 $\pm$ 19.6        | 25.8                               | 0.0002  | 0.013   | 0.014                               | 0.023   |
| <i>BRI3BP</i>  | 7959777      | 12              | 247.9 $\pm$ 34.0      | 222.2 $\pm$ 37.3        | -25.7                              | 0.0034  | 0.049   | -0.016                              | 0.046   |
| <i>CAMK2N1</i> | 7913237      | 1               | 1,134.0 $\pm$ 260.3   | 1,030.1 $\pm$ 237.0     | -103.9                             | 0.0002  | 0.013   | -0.015                              | 0.049   |
| <i>CDKN1A</i>  | 8119088      | 6               | 241.8 $\pm$ 56.2      | 309.6 $\pm$ 72.3        | 67.9                               | 0.0005  | 0.017   | 0.018                               | 0.028   |
| <i>CNTN3</i>   | 8088866      | 3               | 50.3 $\pm$ 10.1       | 40.9 $\pm$ 12.6         | -9.4                               | 0.0002  | 0.013   | -0.022                              | 0.046   |
| <i>CNTN4</i>   | 8077323      | 3               | 251.9 $\pm$ 147.1     | 207.3 $\pm$ 117.7       | -44.6                              | 0.0024  | 0.041   | -0.048                              | 0.010   |
| <i>CRYAB</i>   | 7951662      | 11              | 298.2 $\pm$ 156.6     | 420.3 $\pm$ 237.5       | 122.2                              | 0.0034  | 0.049   | 0.052                               | 0.006   |
| <i>EFR3A</i>   | 8148333      | 8               | 1,179.9 $\pm$ 218.9   | 1,071.9 $\pm$ 203.8     | -108.0                             | 0.0005  | 0.017   | -0.018                              | 0.049   |
| <i>EIF3D</i>   | 8075798      | 22              | 1,277.8 $\pm$ 227.2   | 1,405.8 $\pm$ 261.5     | 128.0                              | 0.0012  | 0.027   | 0.015                               | 0.009   |
| <i>EMP3</i>    | 8030007      | 19              | 132.3 $\pm$ 41.5      | 159.3 $\pm$ 46.0        | 27.0                               | 0.0007  | 0.020   | 0.021                               | 0.047   |
| <i>EXOSC9</i>  | 8097128      | 4               | 264.0 $\pm$ 19.9      | 286.1 $\pm$ 32.4        | 22.1                               | 0.0024  | 0.041   | 0.020                               | 0.013   |
| <i>FUT2</i>    | 8030094      | 19              | 107.3 $\pm$ 33.9      | 92.5 $\pm$ 29.0         | -14.8                              | 0.0024  | 0.041   | -0.046                              | 0.007   |
| <i>FXYD3</i>   | 8027748      | 19              | 426.5 $\pm$ 97.5      | 338.7 $\pm$ 97.4        | -87.7                              | 0.0002  | 0.013   | -0.039                              | 0.002   |
| <i>GNL3</i>    | 8080419      | 3               | 757.3 $\pm$ 102.2     | 888.3 $\pm$ 116.3       | 131.1                              | 0.0012  | 0.027   | 0.016                               | 0.012   |
| <i>HIBADH</i>  | 8138776      | 7               | 578.4 $\pm$ 78.2      | 507.3 $\pm$ 88.2        | -71.1                              | 0.0002  | 0.013   | -0.019                              | 0.013   |
| <i>HSPA1A</i>  | 8118310      | 6               | 2,833.9 $\pm$ 557.5   | 3,360.6 $\pm$ 656.2     | 526.7                              | 0.0005  | 0.017   | 0.026                               | 0.041   |
| <i>HSPA1A</i>  | 8179322      | 6_qbl_hap2      | 2,768.4 $\pm$ 550.8   | 3,294.7 $\pm$ 646.9     | 526.4                              | 0.0005  | 0.017   | 0.025                               | 0.043   |

|                 |         |    |                   |                   |        |        |       |        |       |
|-----------------|---------|----|-------------------|-------------------|--------|--------|-------|--------|-------|
| <i>HSPA6</i>    | 7906764 | 1  | 83.1 ± 31.5       | 131.5 ± 72.9      | 48.4   | 0.0017 | 0.033 | 0.059  | 0.045 |
| <i>HSPA9</i>    | 8114455 | 5  | 1,818.0 ± 162.0   | 1,995.5 ± 178.1   | 177.5  | 0.0024 | 0.041 | 0.011  | 0.048 |
| <i>IQCB1</i>    | 8089954 | 3  | 188.9 ± 46.3      | 218.6 ± 62.4      | 29.6   | 0.0024 | 0.041 | 0.028  | 0.005 |
| <i>JOSD1</i>    | 8076128 | 22 | 883.1 ± 178.9     | 994.1 ± 210.8     | 110.9  | 0.0012 | 0.027 | 0.016  | 0.025 |
| <i>LIPA</i>     | 7934920 | 10 | 1,049.7 ± 191.0   | 919.0 ± 173.4     | -130.7 | 0.0024 | 0.041 | -0.015 | 0.040 |
| <i>LPCAT4</i>   | 7987230 | 15 | 106.4 ± 7.3       | 92.8 ± 10.5       | -13.6  | 0.0007 | 0.020 | -0.013 | 0.049 |
| <i>MED10</i>    | 8110886 | 5  | 352.3 ± 61.5      | 427.3 ± 71.2      | 75.0   | 0.0002 | 0.013 | 0.040  | 0.001 |
| <i>MIA2</i>     | 7974080 | 14 | 86.9 ± 30.4       | 74.2 ± 29.0       | -12.6  | 0.0024 | 0.041 | -0.022 | 0.028 |
| <i>MYL6</i>     | 7956211 | 12 | 4,630.9 ± 266.9   | 4,379.0 ± 339.0   | -251.9 | 0.0002 | 0.013 | -0.009 | 0.042 |
| <i>NEUROD1</i>  | 8057480 | 2  | 1,106.1 ± 465.3   | 980.6 ± 426.5     | -125.5 | 0.0007 | 0.020 | -0.031 | 0.036 |
| <i>NR4A1</i>    | 7955589 | 12 | 115.1 ± 22.4      | 137.1 ± 22.9      | 22.0   | 0.0002 | 0.013 | 0.035  | 0.002 |
| <i>NR4A2</i>    | 8055952 | 2  | 90.7 ± 17.7       | 127.9 ± 32.0      | 37.2   | 0.0012 | 0.027 | 0.043  | 0.004 |
| <i>NR4A3</i>    | 8156848 | 9  | 61.7 ± 5.0        | 76.0 ± 14.7       | 14.3   | 0.0002 | 0.013 | 0.022  | 0.016 |
| <i>PDZK1</i>    | 7904843 | 1  | 224.1 ± 112.8     | 179.6 ± 97.6      | -44.4  | 0.0024 | 0.041 | -0.045 | 0.026 |
| <i>PECR</i>     | 8058837 | 2  | 120.8 ± 22.0      | 97.6 ± 27.9       | -23.3  | 0.0012 | 0.027 | -0.022 | 0.028 |
| <i>PLIN2</i>    | 8160297 | 9  | 392.4 ± 200.1     | 762.9 ± 577.3     | 370.6  | 0.0002 | 0.013 | 0.027  | 0.036 |
| <i>PPP1R15A</i> | 8030128 | 19 | 194.6 ± 36.2      | 319.2 ± 109.8     | 124.6  | 0.0002 | 0.013 | 0.033  | 0.004 |
| <i>PSMB7</i>    | 8164067 | 9  | 1,373.3 ± 151.0   | 1,451.2 ± 140.5   | 77.9   | 0.0017 | 0.033 | 0.015  | 0.028 |
| <i>PXMP2</i>    | 7960117 | 12 | 229.5 ± 35.5      | 205.4 ± 28.6      | -24.2  | 0.0024 | 0.041 | -0.023 | 0.006 |
| <i>RAB7L1</i>   | 7923812 | 1  | 500.6 ± 113.7     | 457.6 ± 118.7     | -43.0  | 0.0034 | 0.049 | -0.021 | 0.025 |
| <i>RASGRP1</i>  | 7987405 | 15 | 159.7 ± 54.0      | 138.0 ± 46.7      | -21.6  | 0.0024 | 0.041 | -0.043 | 0.010 |
| <i>RBM3</i>     | 8167234 | X  | 143.5 ± 36.4      | 164.0 ± 39.7      | 20.5   | 0.0005 | 0.017 | 0.031  | 0.038 |
| <i>SCD5</i>     | 8101366 | 4  | 205.9 ± 57.3      | 179.7 ± 58.0      | -26.3  | 0.0005 | 0.017 | -0.019 | 0.028 |
| <i>SCP2</i>     | 7901513 | 1  | 655.7 ± 107.4     | 594.7 ± 129.2     | -61.0  | 0.0034 | 0.049 | -0.012 | 0.043 |
| <i>SLC2A3</i>   | 7960865 | 12 | 406.4 ± 106.3     | 664.2 ± 517.2     | 257.8  | 0.0002 | 0.013 | 0.030  | 0.036 |
| <i>SLC30A8</i>  | 8148003 | 8  | 5,399.1 ± 1,886.6 | 4,762.5 ± 1,777.0 | -636.6 | 0.0034 | 0.049 | -0.031 | 0.019 |
| <i>SLCO2A1</i>  | 8090823 | 3  | 61.4 ± 14.0       | 44.2 ± 4.5        | -17.2  | 0.0012 | 0.027 | -0.045 | 0.003 |

|                  |         |    |                   |                   |          |        |       |        |       |
|------------------|---------|----|-------------------|-------------------|----------|--------|-------|--------|-------|
| <i>SNHG12</i>    | 7914202 | 1  | 171.6 ± 75.1      | 267.0 ± 123.8     | 95.4     | 0.0034 | 0.049 | 0.035  | 0.024 |
| <i>SORD</i>      | 7983393 | 15 | 568.3 ± 184.7     | 470.7 ± 152.8     | -97.6    | 0.0024 | 0.041 | -0.028 | 0.022 |
| <i>SRXN1</i>     | 8064375 | 20 | 867.7 ± 225.9     | 1,159.6 ± 396.4   | 291.9    | 0.0012 | 0.027 | 0.023  | 0.029 |
| <i>SYNJ2BP</i>   | 7979916 | 14 | 565.0 ± 47.9      | 501.3 ± 62.2      | -63.7    | 0.0034 | 0.049 | -0.014 | 0.040 |
| <i>TM4SF4</i>    | 8083301 | 3  | 4,704.1 ± 1,740.2 | 3,956.5 ± 1,856.2 | -747.7   | 0.0002 | 0.013 | -0.054 | 0.003 |
| <i>TMEM54</i>    | 7914592 | 1  | 434.0 ± 93.5      | 364.5 ± 82.6      | -69.6    | 0.0002 | 0.013 | -0.017 | 0.042 |
| <i>TMEM63B</i>   | 8119926 | 6  | 168.6 ± 21.2      | 149.1 ± 19.3      | -19.4    | 0.0034 | 0.049 | -0.015 | 0.019 |
| <i>TNFRSF10B</i> | 8149733 | 8  | 321.5 ± 97.5      | 367.1 ± 139.2     | 45.6     | 0.0007 | 0.020 | 0.029  | 0.013 |
| <i>UFM1</i>      | 7968670 | 13 | 1,058.4 ± 117.1   | 1,229.9 ± 142.0   | 171.5    | 0.0017 | 0.033 | 0.012  | 0.018 |
| <i>UGT2B15</i>   | 8100737 | 4  | 2,339.8 ± 1,324.2 | 1,394.2 ± 1,331.7 | -945.6   | 0.0007 | 0.020 | -0.076 | 0.037 |
| <i>UGT2B15</i>   | 8100746 | 4  | 2,339.8 ± 1,324.2 | 1,394.2 ± 1,331.7 | -945.6   | 0.0007 | 0.020 | -0.076 | 0.037 |
| <i>UGT2B7</i>    | 8100758 | 4  | 2,820.4 ± 1,716.6 | 1,682.2 ± 1,628.9 | -1,138.2 | 0.0007 | 0.020 | -0.077 | 0.033 |
| <i>WDR44</i>     | 8169519 | X  | 208.8 ± 38.1      | 195.2 ± 41.1      | -13.6    | 0.0034 | 0.049 | -0.013 | 0.040 |
| <i>WEE1</i>      | 7938348 | 11 | 133.2 ± 24.9      | 155.1 ± 31.4      | 21.9     | 0.0017 | 0.033 | 0.018  | 0.042 |
| <i>VILI</i>      | 8048319 | 2  | 137.9 ± 42.8      | 110.6 ± 43.4      | -27.3    | 0.0024 | 0.041 | -0.037 | 0.027 |
| <i>ZFAND2A</i>   | 8137709 | 7  | 174.8 ± 30.4      | 208.7 ± 27.0      | 33.8     | 0.0005 | 0.017 | 0.036  | 0.045 |
| <i>ZNF165</i>    | 8117630 | 6  | 107.7 ± 22.1      | 180.5 ± 46.4      | 72.8     | 0.0002 | 0.013 | 0.026  | 0.011 |
| <i>ZNFX1-AS1</i> | 8063337 | 20 | 512.3 ± 138.3     | 659.0 ± 177.7     | 146.7    | 0.0002 | 0.013 | 0.021  | 0.008 |
